# Supplementary material for: Genetic Variants Associated With Plasma Lipids Are Associated With the Lipid Response to Niacin
Source: PubMed Central journal article supplement (PMC6404865; doi:10.1161/jaha.117.008461), 2018-09-29
Supplement: JAH3-7-0e03488-s001.pdf [file JAH3-7-0e03488-s001.pdf]

# **SUPPLEMENTAL MATERIAL**

Table S1. SNPs tested and association with baseline lipid traits.

| SNP        | Trait | Locus        | Chr | MAF  | N    | Effect of minor allele |       |       | Pvalue   | Proxy | GLGC SNP   | r2   |
|------------|-------|--------------|-----|------|------|------------------------|-------|-------|----------|-------|------------|------|
|            |       |              |     |      |      | Beta                   | SE    | Stat  |          |       |            |      |
| rs12748152 | HDL   | PIGV-NR0B2   | 1   | 0.08 | 2054 | -0.006                 | 0.053 | -0.12 | 0.91     |       |            |      |
| rs12145743 | HDL   | HDGF-PMVK    | 1   | 0.34 | 2054 | -0.018                 | 0.030 | -0.59 | 0.56     |       |            |      |
| rs1689800  | HDL   | ZNF648       | 1   | 0.37 | 2054 | -0.015                 | 0.030 | -0.51 | 0.61     |       |            |      |
| rs4650994  | HDL   | ANGPTL1      | 1   | 0.47 | 2054 | 0.0004                 | 0.028 | 0.01  | 0.99     |       |            |      |
| rs4660293  | HDL   | PABPC4       | 1   | 0.24 | 2054 | -0.065                 | 0.034 | -1.89 | 0.06     |       |            |      |
| rs4846914  | HDL   | GALNT2       | 1   | 0.41 | 2054 | -0.046                 | 0.029 | -1.58 | 0.11     |       |            |      |
| rs12328675 | HDL   | COBLL1       | 2   | 0.12 | 2054 | -0.059                 | 0.045 | -1.30 | 0.19     |       |            |      |
| rs2972146  | HDL   | IRS1         | 2   | 0.34 | 2054 | 0.029                  | 0.031 | 0.92  | 0.36     |       |            |      |
| rs13326165 | HDL   | STAB1        | 3   | 0.20 | 2054 | -0.023                 | 0.036 | -0.63 | 0.53     |       |            |      |
| rs2013208  | HDL   | RBMS5        | 3   | 0.48 | 2054 | 0.037                  | 0.029 | 1.28  | 0.20     |       |            |      |
| rs2290547  | HDL   | SETD2        | 3   | 0.18 | 2054 | 0.055                  | 0.038 | 1.45  | 0.15     |       |            |      |
| rs2606736  | HDL   | ATG7         | 3   | 0.38 | 2054 | -0.011                 | 0.030 | -0.36 | 0.72     |       |            |      |
| rs6805251  | HDL   | GSK3B        | 3   | 0.38 | 2054 | -0.049                 | 0.030 | -1.66 | 0.10     |       |            |      |
| rs10019888 | HDL   | C4orf52      | 4   | 0.17 | 2054 | 0.010                  | 0.038 | 0.28  | 0.78     |       |            |      |
| rs13107325 | HDL   | SLC39A8      | 4   | 0.08 | 2054 | -0.018                 | 0.053 | -0.35 | 0.73     |       |            |      |
| rs2602836  | HDL   | ADH5         | 4   | 0.44 | 2054 | -0.030                 | 0.029 | -1.03 | 0.31     |       |            |      |
| rs3822072  | HDL   | FAM13A       | 4   | 0.48 | 2054 | 0.002                  | 0.029 | 0.07  | 0.94     |       |            |      |
| rs6450176  | HDL   | ARL15        | 5   | 0.26 | 2054 | -0.064                 | 0.032 | -1.98 | 0.05     |       |            |      |
| rs1936800  | HDL   | RSPO3        | 6   | 0.48 | 2054 | 0.028                  | 0.029 | 0.98  | 0.33     |       |            |      |
| rs634869   | HDL   | CITED2       | 6   | 0.43 | 2054 | -0.005                 | 0.029 | -0.18 | 0.85     | Y     | rs605066   | 1.00 |
| rs17173637 | HDL   | TMEM176A     | 7   | 0.10 | 2054 | -0.094                 | 0.049 | -1.93 | 0.05     |       |            |      |
| rs4142995  | HDL   | SNX13        | 7   | 0.39 | 2054 | 0.009                  | 0.029 | 0.31  | 0.76     |       |            |      |
| rs4731702  | HDL   | KLF14        | 7   | 0.48 | 2054 | 0.001                  | 0.028 | 0.02  | 0.99     |       |            |      |
| rs4917014  | HDL   | IKZF1        | 7   | 0.32 | 2054 | 0.005                  | 0.031 | 0.16  | 0.87     |       |            |      |
| rs702485   | HDL   | DAGLB        | 7   | 0.45 | 2054 | -0.005                 | 0.029 | -0.16 | 0.87     |       |            |      |
| rs2293889  | HDL   | TRPS1        | 8   | 0.44 | 2054 | 0.006                  | 0.029 | 0.20  | 0.84     |       |            |      |
| rs9987289  | HDL   | PPP1R3B      | 8   | 0.09 | 2054 | -0.028                 | 0.050 | -0.55 | 0.58     |       |            |      |
| rs1883025  | HDL   | ABCA1        | 9   | 0.26 | 2054 | -0.012                 | 0.032 | -0.36 | 0.72     |       |            |      |
| rs581080   | HDL   | TTC39B       | 9   | 0.19 | 2054 | -0.087                 | 0.037 | -2.36 | 0.02     |       |            |      |
| rs970548   | HDL   | MARCH8-ALOX5 | 10  | 0.25 | 2054 | -0.017                 | 0.033 | -0.50 | 0.61     |       |            |      |
| rs11246602 | HDL   | OR4C46       | 11  | 0.12 | 2054 | 0.042                  | 0.045 | 0.93  | 0.35     |       |            |      |
| rs12801636 | HDL   | KAT5         | 11  | 0.22 | 2054 | -0.021                 | 0.034 | -0.61 | 0.54     |       |            |      |
| rs2923084  | HDL   | AMPD3        | 11  | 0.19 | 2054 | -0.025                 | 0.037 | -0.66 | 0.51     |       |            |      |
| rs3136441  | HDL   | LRP4         | 11  | 0.12 | 2054 | 0.130                  | 0.045 | 2.90  | 0.0037   |       |            |      |
| rs499974   | HDL   | MOGAT2-DGAT2 | 11  | 0.17 | 2054 | -0.056                 | 0.038 | -1.47 | 0.14     |       |            |      |
| rs10850443 | HDL   | MVK          | 12  | 0.47 | 2054 | -0.001                 | 0.028 | -0.05 | 0.96     | Y     | rs7134594  | 0.97 |
| rs10773003 | HDL   | SBNO1        | 12  | 0.09 | 2043 | 0.048                  | 0.051 | 0.94  | 0.35     | Y     | rs4759375  | 1.00 |
| rs11057408 | HDL   | ZNF664       | 12  | 0.33 | 2054 | 0.009                  | 0.030 | 0.30  | 0.77     | Y     | rs4765127  | 1.00 |
| rs7134375  | HDL   | PDE3A        | 12  | 0.42 | 2054 | 0.049                  | 0.029 | 1.67  | 0.10     |       |            |      |
| rs838880   | HDL   | SCARB1       | 12  | 0.31 | 2054 | 0.063                  | 0.031 | 2.04  | 0.04     |       |            |      |
| rs4983559  | HDL   | ZBTB42-AKT1  | 14  | 0.39 | 2054 | 0.037                  | 0.029 | 1.25  | 0.21     |       |            |      |
| rs1532085  | HDL   | LIPC         | 15  | 0.37 | 2054 | 0.106                  | 0.030 | 3.58  | 0.00035  |       |            |      |
| rs2652834  | HDL   | LACTB        | 15  | 0.20 | 2054 | -0.002                 | 0.036 | -0.06 | 0.95     |       |            |      |
| rs1121980  | HDL   | FTO          | 16  | 0.44 | 2054 | -0.037                 | 0.029 | -1.26 | 0.21     |       |            |      |
| rs16942887 | HDL   | LCAT         | 16  | 0.12 | 2054 | 0.087                  | 0.045 | 1.94  | 0.05     |       |            |      |
| rs2925979  | HDL   | CMIP         | 16  | 0.31 | 2054 | 0.001                  | 0.031 | 0.04  | 0.97     |       |            |      |
| rs3764261  | HDL   | CETP         | 16  | 0.28 | 2054 | 0.178                  | 0.032 | 5.60  | 2.40E-08 |       |            |      |
| rs11869286 | HDL   | STARD3       | 17  | 0.35 | 2054 | 0.013                  | 0.030 | 0.42  | 0.68     |       |            |      |
| rs4129767  | HDL   | PGS1         | 17  | 0.48 | 2054 | 0.068                  | 0.029 | 2.37  | 0.02     |       |            |      |
| rs4148008  | HDL   | ABCA8        | 17  | 0.32 | 2054 | -0.055                 | 0.031 | -1.76 | 0.08     |       |            |      |
| rs12967135 | HDL   | MC4R         | 18  | 0.24 | 2054 | -0.010                 | 0.033 | -0.30 | 0.76     |       |            |      |
| rs7239867  | HDL   | LIPG         | 18  | 0.17 | 2054 | -0.077                 | 0.038 | -2.00 | 0.05     |       |            |      |
| rs17695224 | HDL   | HAS1         | 19  | 0.29 | 2054 | 0.038                  | 0.032 | 1.20  | 0.23     |       |            |      |
| rs386000   | HDL   | LILRA3       | 19  | 0.20 | 2054 | 0.061                  | 0.036 | 1.68  | 0.09     |       |            |      |
| rs7254882  | HDL   | ANGPTL4      | 19  | 0.48 | 2054 | 0.011                  | 0.029 | 0.37  | 0.71     |       |            |      |
| rs737337   | HDL   | ANGPTL8      | 19  | 0.09 | 2054 | -0.043                 | 0.051 | -0.85 | 0.40     |       |            |      |
| rs1800961  | HDL   | HNF4A        | 20  | 0.03 | 2054 | -0.060                 | 0.085 | -0.71 | 0.48     |       |            |      |
| rs6065906  | HDL   | PLTP         | 20  | 0.19 | 2054 | 0.027                  | 0.036 | 0.73  | 0.47     |       |            |      |
| rs181362   | HDL   | UBE2L3       | 22  | 0.20 | 2054 | -0.036                 | 0.036 | -1.02 | 0.31     |       |            |      |
| rs2479409  | LDL   | PCSK9        | 1   | 0.35 | 2054 | -0.006                 | 0.032 | -0.18 | 0.85     |       |            |      |
| rs267733   | LDL   | ANXA9-CERS2  | 1   | 0.15 | 2054 | -0.052                 | 0.046 | -1.13 | 0.26     |       |            |      |
| rs629301   | LDL   | SORT1        | 1   | 0.20 | 2054 | -0.153                 | 0.039 | -3.95 | 8.05E-05 |       |            |      |
| rs10490626 | LDL   | INSIG2       | 2   | 0.07 | 2054 | -0.141                 | 0.060 | -2.36 | 0.02     |       |            |      |
| rs1250229  | LDL   | FN1          | 2   | 0.27 | 2054 | 0.006                  | 0.035 | 0.18  | 0.85     |       |            |      |
| rs1367117  | LDL   | APOB         | 2   | 0.30 | 2054 | 0.035                  | 0.034 | 1.02  | 0.31     |       |            |      |
| rs2030746  | LDL   | LOC84931     | 2   | 0.42 | 2054 | 0.033                  | 0.032 | 1.03  | 0.30     |       |            |      |
| rs2710642  | LDL   | EHBP1        | 2   | 0.32 | 2054 | -0.023                 | 0.033 | -0.70 | 0.48     |       |            |      |
| rs4299376  | LDL   | ABCG5/8      | 2   | 0.31 | 2054 | 0.082                  | 0.034 | 2.44  | 0.01     |       |            |      |
| rs17404153 | LDL   | ACAD11       | 3   | 0.12 | 2054 | -0.017                 | 0.048 | -0.35 | 0.73     |       |            |      |
| rs7640978  | LDL   | CMTM6        | 3   | 0.08 | 2054 | 0.011                  | 0.056 | 0.20  | 0.84     |       |            |      |
| rs4530754  | LDL   | CSNK1G3      | 5   | 0.44 | 2054 | -0.020                 | 0.032 | -0.64 | 0.52     |       |            |      |
| rs1564348  | LDL   | LPA          | 6   | 0.16 | 2054 | -0.025                 | 0.043 | -0.59 | 0.55     |       |            |      |
| rs1800562  | LDL   | HFE          | 6   | 0.06 | 2054 | 0.024                  | 0.063 | 0.38  | 0.70     |       |            |      |
| rs3757354  | LDL   | MYLIP        | 6   | 0.21 | 2054 | -0.055                 | 0.038 | -1.44 | 0.15     |       |            |      |
| rs4722551  | LDL   | MIR148A      | 7   | 0.17 | 2054 | -0.010                 | 0.041 | -0.23 | 0.81     |       |            |      |
| rs10102164 | LDL   | SOX17        | 8   | 0.20 | 2054 | -0.001                 | 0.039 | -0.02 | 0.98     |       |            |      |
| rs7832643  | LDL   | PLEC1        | 8   | 0.41 | 2054 | 0.008                  | 0.032 | 0.25  | 0.80     | Y     | rs11136341 | 0.81 |
| rs9411489  | LDL   | ABO          | 9   | 0.20 | 2054 | 0.058                  | 0.038 | 1.53  | 0.13     |       |            |      |
| rs11220462 | LDL   | ST3GAL4      | 11  | 0.13 | 2054 | 0.019                  | 0.046 | 0.42  | 0.68     |       |            |      |
| rs4942486  | LDL   | BRCA2        | 13  | 0.48 | 2054 | 0.039                  | 0.031 | 1.25  | 0.21     |       |            |      |
| rs8017377  | LDL   | NYNRIN       | 14  | 0.47 | 2054 | -0.056                 | 0.031 | -1.78 | 0.08     |       |            |      |

|            |            |            |    |      |      |        |       |       |         |   |            |      |
|------------|------------|------------|----|------|------|--------|-------|-------|---------|---|------------|------|
| rs1801689  | LDL        | APOH-PRXCA | 17 | 0.03 | 2054 | 0.040  | 0.090 | 0.45  | 0.66    |   |            |      |
| rs6504872  | LDL        | OSBPL7     | 17 | 0.49 | 2054 | 0.001  | 0.031 | 0.02  | 0.99    |   |            |      |
| rs4420638  | LDL        | APOE       | 19 | 0.18 | 2054 | 0.022  | 0.041 | 0.54  | 0.59    |   |            |      |
| rs6511720  | LDL        | LDLR       | 19 | 0.11 | 2054 | -0.087 | 0.051 | -1.72 | 0.09    |   |            |      |
| rs2223745  | LDL        | TOP1       | 20 | 0.48 | 2054 | 0.050  | 0.032 | 1.58  | 0.11    |   |            |      |
| rs2328223  | LDL        | SNX5       | 20 | 0.19 | 2054 | -0.071 | 0.040 | -1.79 | 0.07    |   |            |      |
| rs364585   | LDL        | SPTLC3     | 20 | 0.39 | 2054 | -0.063 | 0.032 | -2.00 | 0.05    |   |            |      |
| rs5763662  | LDL        | MTMR3      | 22 | 0.02 | 2054 | 0.065  | 0.114 | 0.57  | 0.57    |   |            |      |
| rs1077514  | Total Chol | ASAP3      | 1  | 0.14 | 2054 | 0.031  | 0.044 | 0.71  | 0.48    |   |            |      |
| rs1556562  | Total Chol | EVI5       | 1  | 0.21 | 2054 | -0.001 | 0.038 | -0.02 | 0.99    | Y | rs7515577  | 1.00 |
| rs2642442  | Total Chol | MOSC1      | 1  | 0.31 | 2054 | -0.071 | 0.033 | -2.15 | 0.03    |   |            |      |
| rs558971   | Total Chol | IRF2BP2    | 1  | 0.47 | 2054 | -0.039 | 0.031 | -1.29 | 0.20    | Y | rs514230   | 0.96 |
| rs11563251 | Total Chol | UGT1A1     | 2  | 0.11 | 2054 | 0.027  | 0.050 | 0.54  | 0.59    |   |            |      |
| rs11694172 | Total Chol | FAM117B    | 2  | 0.24 | 2054 | 0.006  | 0.036 | 0.18  | 0.86    |   |            |      |
| rs2287623  | Total Chol | ABCB11     | 2  | 0.40 | 2054 | 0.010  | 0.031 | 0.31  | 0.76    |   |            |      |
| rs7570971  | Total Chol | RAB3GAP1   | 2  | 0.37 | 2054 | -0.020 | 0.030 | -0.65 | 0.51    |   |            |      |
| rs11709504 | Total Chol | RAF1       | 3  | 0.19 | 2054 | 0.062  | 0.041 | 1.52  | 0.13    | Y | rs2290159  | 0.81 |
| rs13315871 | Total Chol | PXK        | 3  | 0.09 | 2054 | 0.038  | 0.054 | 0.71  | 0.47    |   |            |      |
| rs12916    | Total Chol | HMGCR      | 5  | 0.41 | 2054 | 0.045  | 0.031 | 1.46  | 0.14    |   |            |      |
| rs6882076  | Total Chol | TIMD4      | 5  | 0.36 | 2054 | 0.005  | 0.032 | 0.14  | 0.89    |   |            |      |
| rs2758886  | Total Chol | KCNK17     | 6  | 0.30 | 2054 | 0.034  | 0.033 | 1.02  | 0.31    |   |            |      |
| rs2814982  | Total Chol | C6orf106   | 6  | 0.11 | 2054 | -0.017 | 0.049 | -0.35 | 0.73    |   |            |      |
| rs3177928  | Total Chol | HLA        | 6  | 0.15 | 2054 | -0.038 | 0.043 | -0.88 | 0.38    |   |            |      |
| rs9376090  | Total Chol | HBS1L      | 6  | 0.25 | 2054 | 0.012  | 0.034 | 0.36  | 0.72    |   |            |      |
| rs12670798 | Total Chol | DNAH11     | 7  | 0.24 | 2054 | 0.053  | 0.036 | 1.48  | 0.14    |   |            |      |
| rs1997243  | Total Chol | GPR146     | 7  | 0.16 | 2054 | 0.050  | 0.042 | 1.19  | 0.23    |   |            |      |
| rs2072183  | Total Chol | NPC1L1     | 7  | 0.23 | 2054 | 0.068  | 0.037 | 1.86  | 0.06    |   |            |      |
| rs4738684  | Total Chol | CYP7A1     | 8  | 0.34 | 2054 | -0.010 | 0.033 | -0.30 | 0.77    | Y | rs2081687  | 0.91 |
| rs3780181  | Total Chol | VLDLR      | 9  | 0.07 | 2054 | -0.069 | 0.061 | -1.13 | 0.26    |   |            |      |
| rs10904908 | Total Chol | VIM-CUBN   | 10 | 0.43 | 2054 | 0.051  | 0.031 | 1.63  | 0.10    |   |            |      |
| rs2255141  | Total Chol | GPAM       | 10 | 0.31 | 2054 | -0.032 | 0.034 | -0.94 | 0.35    |   |            |      |
| rs10128711 | Total Chol | SPTY2D1    | 11 | 0.27 | 2054 | -0.030 | 0.034 | -0.87 | 0.38    |   |            |      |
| rs11603023 | Total Chol | PHLDB1     | 11 | 0.44 | 2054 | -0.025 | 0.030 | -0.81 | 0.42    |   |            |      |
| rs7941030  | Total Chol | UBASH3B    | 11 | 0.39 | 2054 | -0.002 | 0.031 | -0.06 | 0.95    |   |            |      |
| rs11065987 | Total Chol | BRAP       | 12 | 0.45 | 2054 | -0.082 | 0.031 | -2.62 | 0.0090  |   |            |      |
| rs1169288  | Total Chol | HNF1A      | 12 | 0.31 | 2054 | 0.090  | 0.033 | 2.69  | 0.0072  |   |            |      |
| rs4883201  | Total Chol | PHC1-A2ML1 | 12 | 0.11 | 2054 | -0.015 | 0.049 | -0.31 | 0.75    |   |            |      |
| rs2000999  | Total Chol | HPR        | 16 | 0.22 | 2054 | 0.030  | 0.037 | 0.81  | 0.42    |   |            |      |
| rs314253   | Total Chol | DLG4       | 17 | 0.34 | 2054 | -0.044 | 0.033 | -1.32 | 0.19    |   |            |      |
| rs10401969 | Total Chol | CILP2      | 19 | 0.06 | 2054 | 0.007  | 0.064 | 0.10  | 0.92    |   |            |      |
| rs492602   | Total Chol | FLJ36070   | 19 | 0.49 | 2054 | 0.007  | 0.031 | 0.22  | 0.82    |   |            |      |
| rs2277862  | Total Chol | ERGIC3     | 20 | 0.15 | 2054 | 0.013  | 0.043 | 0.30  | 0.76    |   |            |      |
| rs2902940  | Total Chol | MAFB       | 20 | 0.30 | 2054 | -0.031 | 0.034 | -0.91 | 0.37    |   |            |      |
| rs138777   | Total Chol | TOM1       | 22 | 0.34 | 2054 | 0.021  | 0.032 | 0.66  | 0.51    |   |            |      |
| rs4253772  | Total Chol | PPARA      | 22 | 0.11 | 2054 | 0.138  | 0.050 | 2.76  | 0.0059  |   |            |      |
| rs2131925  | TG         | ANGPTL3    | 1  | 0.33 | 2054 | -0.089 | 0.033 | -2.68 | 0.0074  |   |            |      |
| rs1260326  | TG         | GCKR       | 2  | 0.43 | 2054 | 0.112  | 0.031 | 3.59  | 0.0003  |   |            |      |
| rs645040   | TG         | MSL2L1     | 3  | 0.22 | 2054 | -0.028 | 0.038 | -0.74 | 0.46    |   |            |      |
| rs442177   | TG         | KLHL8      | 4  | 0.40 | 2054 | -0.050 | 0.031 | -1.59 | 0.11    |   |            |      |
| rs6831256  | TG         | LRPAP1     | 4  | 0.44 | 2054 | 0.053  | 0.031 | 1.70  | 0.09    |   |            |      |
| rs9686661  | TG         | MAP3K1     | 5  | 0.21 | 2054 | 0.021  | 0.038 | 0.54  | 0.59    |   |            |      |
| rs719726   | TG         | RSPO3      | 6  | 0.43 | 2054 | -0.005 | 0.031 | -0.16 | 0.87    |   |            |      |
| rs998584   | TG         | VEGFA      | 6  | 0.50 | 2054 | -0.021 | 0.031 | -0.70 | 0.49    |   |            |      |
| rs13238203 | TG         | TYW1B      | 7  | 0.03 | 2054 | -0.008 | 0.093 | -0.08 | 0.93    |   |            |      |
| rs17145738 | TG         | MLXIPL     | 7  | 0.11 | 2054 | -0.037 | 0.050 | -0.74 | 0.46    |   |            |      |
| rs38855    | TG         | MET        | 7  | 0.48 | 2054 | 0.033  | 0.031 | 1.05  | 0.30    |   |            |      |
| rs11776767 | TG         | PINX1      | 8  | 0.38 | 2054 | 0.032  | 0.032 | 0.99  | 0.32    |   |            |      |
| rs12678919 | TG         | LPL        | 8  | 0.07 | 2054 | -0.131 | 0.060 | -2.20 | 0.03    |   |            |      |
| rs2954029  | TG         | TRIB1      | 8  | 0.44 | 2054 | -0.113 | 0.031 | -3.61 | 0.00032 |   |            |      |
| rs10761741 | TG         | JMJD1C     | 10 | 0.44 | 2054 | 0.045  | 0.031 | 1.44  | 0.15    | Y | rs10761731 | 0.99 |
| rs1832007  | TG         | AKR1C4     | 10 | 0.15 | 2054 | -0.081 | 0.044 | -1.83 | 0.07    |   |            |      |
| rs2068888  | TG         | CYP26A1    | 10 | 0.44 | 2054 | -0.030 | 0.031 | -0.96 | 0.34    |   |            |      |
| rs174546   | TG         | FADS1-2-3  | 11 | 0.34 | 2054 | 0.072  | 0.033 | 2.19  | 0.03    |   |            |      |
| rs11613352 | TG         | LRP1       | 12 | 0.22 | 2054 | 0.000  | 0.038 | -0.01 | 0.99    |   |            |      |
| rs2412710  | TG         | CAPN3      | 15 | 0.02 | 2054 | -0.012 | 0.104 | -0.12 | 0.91    |   |            |      |
| rs2929275  | TG         | FRMD5      | 15 | 0.05 | 2054 | 0.056  | 0.067 | 0.84  | 0.40    | Y | rs2929282  | 0.97 |
| rs3198697  | TG         | PDXDC1     | 16 | 0.39 | 2054 | -0.043 | 0.032 | -1.36 | 0.17    |   |            |      |
| rs9930333  | TG         | FTO        | 16 | 0.44 | 2054 | 0.077  | 0.031 | 2.46  | 0.01    |   |            |      |
| rs8077889  | TG         | MPP3       | 17 | 0.22 | 2054 | 0.067  | 0.038 | 1.75  | 0.08    |   |            |      |
| rs7248104  | TG         | INSR       | 19 | 0.41 | 2054 | -0.016 | 0.032 | -0.51 | 0.61    |   |            |      |
| rs731839   | TG         | PEPD       | 19 | 0.34 | 2054 | 0.046  | 0.033 | 1.39  | 0.16    |   |            |      |
| rs5756931  | TG         | PLA2G6     | 22 | 0.39 | 2054 | -0.026 | 0.031 | -0.84 | 0.40    |   |            |      |

|           |       |         |   |      |      |        |       |       |          |
|-----------|-------|---------|---|------|------|--------|-------|-------|----------|
| rs394352  | Lp(a) | SLC22A3 | 6 | 0.29 | 2054 | -0.245 | 0.034 | -7.22 | 7.30E-13 |
| rs2504927 | Lp(a) | SLC22A3 | 6 | 0.43 | 2054 | -0.250 | 0.032 | -7.90 | 4.59E-15 |
| rs4252109 | Lp(a) | PLG     | 6 | 0.29 | 2054 | -0.290 | 0.034 | -8.62 | 1.32E-17 |
| rs539298  | Lp(a) | SLC22A3 | 6 | 0.47 | 2054 | -0.273 | 0.031 | -8.84 | 1.99E-18 |
| rs7769879 | Lp(a) | SLC22A3 | 6 | 0.39 | 2054 | 0.351  | 0.032 | 11.11 | 7.03E-28 |
| rs986666  | Lp(a) | SLC22A3 | 6 | 0.20 | 2054 | -0.155 | 0.039 | -3.95 | 8.10E-05 |
| rs2457561 | Lp(a) | SLC22A3 | 6 | 0.19 | 2054 | -0.154 | 0.041 | -3.81 | 0.00015  |
| rs3798221 | Lp(a) | LPA     | 6 | 0.19 | 2054 | -0.282 | 0.039 | -7.18 | 1.00E-12 |

GLGC= Global Lipids Genetic Consortium
